1 **Title**

2 Potassium rhythms couple the circadian clock to the cell cycle.

3

4 **Authors**

5 Sergio Gil Rodríguez<sup>1\*</sup>, Priya Crosby<sup>2&\*</sup>, Louise L. Hansen<sup>1</sup>, Ellen Grünewald<sup>1</sup>, Andrew D.  
6 Beale<sup>3</sup>, Rebecca K. Spangler<sup>2</sup>, Beverley M. Rabbitts<sup>2</sup>, Carrie L. Partch<sup>2</sup>, Alessandra  
7 Stangherlin<sup>4</sup>, John S. O'Neill<sup>3</sup>, Gerben van Ooijen<sup>1&</sup>

8

9 **Affiliations**

10 1) School of Biological Sciences, University of Edinburgh, Max Born Crescent EH9 3BF  
11 Edinburgh, United Kingdom

12 2) Department of Chemistry and Biochemistry, University of California Santa Cruz, Santa  
13 Cruz, CA, 95064, USA

14 3) UKRI MRC Laboratory of Molecular Biology, Francis Crick Ave, Cambridge, CB2 0QH,  
15 United Kingdom

16 4) Faculty of Medicine and University Hospital Cologne, Cluster of Excellence Cellular Stress  
17 Responses in Aging-associated Diseases (CECAD), Institute for Mitochondrial Diseases and  
18 Ageing, University of Cologne, Joseph-Stelzmann-Str, 50931, Cologne, Germany

19

20 \*) These authors contributed equally

21 &) Correspondence to [Gerben.vanOoijen@ed.ac.uk](mailto:Gerben.vanOoijen@ed.ac.uk) or [pcrosby@ed.ac.uk](mailto:pcrosby@ed.ac.uk)

22

23

1 **Abstract**

2 Circadian (~24 h) rhythms are a fundamental feature of life, and their disruption increases  
3 the risk of infectious diseases, metabolic disorders, and cancer<sup>1-6</sup>. Circadian rhythms couple  
4 to the cell cycle across eukaryotes<sup>7,8</sup> but the underlying mechanism is unknown. We  
5 previously identified an evolutionarily conserved circadian oscillation in intracellular  
6 potassium concentration,  $[K^+]_i$ <sup>9,10</sup>. As critical events in the cell cycle are regulated by  
7 intracellular potassium<sup>11,12</sup>, an enticing hypothesis is that circadian rhythms in  $[K^+]_i$  form the  
8 basis of this coupling. We used a minimal model cell, the alga *Ostreococcus tauri*, to uncover  
9 the role of potassium in linking these two cycles. We found direct reciprocal feedback  
10 between  $[K^+]_i$  and circadian gene expression. Inhibition of proliferation by manipulating  
11 potassium rhythms was dependent on the phase of the circadian cycle. Furthermore, we  
12 observed a total inhibition of cell proliferation when circadian gene expression is inhibited.  
13 Strikingly, under these conditions a sudden enforced gradient of extracellular potassium was  
14 sufficient to induce a round of cell division. Finally, we provide evidence that interactions  
15 between potassium and circadian rhythms also influence proliferation in mammalian cells.  
16 These results establish circadian regulation of intracellular potassium levels as a primary  
17 factor coupling the cell- and circadian cycles across diverse organisms.

## 1 **Main**

2 Evolution has provided most eukaryotes with an internal biological timekeeping system to  
3 anticipate predictable environmental changes that occur due to Earth's daily rotation<sup>13</sup>. This  
4 endogenous and self-sustaining mechanism, colloquially known as the circadian clock,  
5 enhances physiology, metabolism, and overall fitness<sup>13,14</sup>. Conversely, altered or disrupted  
6 circadian rhythmicity impacts on many key cellular processes and results in increased risk of  
7 disorders and pathologies<sup>15</sup>, including metabolic syndrome and cancer<sup>16-18</sup>. At the cellular  
8 level, circadian rhythmicity involves the rhythmic expression of clock genes that engage in  
9 Transcriptional/Translational Feedback Loops (TTFLs)<sup>13</sup>, which is further regulated by highly  
10 conserved post-transcriptional mechanisms that are not currently fully understood<sup>19,20</sup>.

11 Bidirectional interaction between the circadian clock and the cell cycle has been  
12 described across organisms that display circadian rhythmicity, from cyanobacteria to  
13 mammals<sup>21</sup>. Cues that synchronise circadian rhythms with the external day/night cycle also  
14 shift timing of cell division and growth, indicating a preferred circadian time for  
15 cytokinesis<sup>22-25</sup>. Thus, while evidence exists of coupling between the circadian system and  
16 the cell cycle, the mechanistic connection has not been elucidated.

17 Previously, we reported circadian rhythms in the concentration of intracellular ions  
18 in representative species from all eukaryotic kingdoms<sup>9</sup>. These ion rhythms functionally  
19 regulate fundamental cellular processes including translation, metabolism, and  
20 proteostasis<sup>9,10,26</sup>. Potassium is the most abundant ion in any eukaryotic cell, constituting an  
21 average of 0.2% of the total body weight in humans<sup>27</sup> and 2-10% of dry weight in plants<sup>28</sup>,  
22 and acts to maintain fluid and electrolyte balance over membranes<sup>29</sup>. Even small alterations  
23 in the intracellular balance and flux of potassium are linked to important metabolic and cell  
24 cycle disorders, including cancer<sup>10,30</sup>. Therefore, high-amplitude circadian rhythms in  
25 potassium likely impact upon crucial cellular processes such as membrane potential, ion  
26 homeostasis, enzyme activity, and osmotic balance<sup>9,31,32</sup>. Most notably for this work,  
27 intracellular potassium and potassium channels are well-established to be one of several  
28 mechanisms that regulate appropriate progression of the cell cycle<sup>11,12</sup>, and previous  
29 indications exist that potassium transport inhibition suppresses proliferation of cancer  
30 cells<sup>33-36</sup>.

31 We initially employed the picoeukaryote *Ostreococcus tauri* to test the hypothesis  
32 that circadian rhythms in potassium mechanistically couple the cell- and circadian cycles.  
33 This well-established minimal model cell for circadian rhythms<sup>9,20</sup> shows the strongest  
34 coupling between the cell cycle and circadian cycle of all known eukaryotes<sup>37</sup>, making it  
35 ideal for studying the reciprocal interaction between potassium rhythms, the circadian TTFL,  
36 and cell proliferation. We then expanded our studies to further test the generality of the  
37 resulting hypotheses in mammalian cells, separated from *Ostreococcus* by ~1 billion years of  
38 evolution<sup>38</sup>.

39

## 40 **Reciprocal feedback between potassium rhythms and clock gene expression**

41 We first validated in *Ostreococcus* some key assumptions that underlie this investigation: 1)  
42 Intracellular potassium levels,  $[K^+]_i$ , oscillate in a circadian manner similarly to magnesium<sup>9</sup>  
43 in the absence of environmental cues, peaking in the early subjective night. Other ions, such  
44 as calcium, remain constant over time (Fig. 1A); 2) potassium is highly abundant  
45 intracellularly with a large gradient over the plasma membrane (Extended Data Fig. 1A-B); 3)  
46 ion rhythms confer circadian rhythms in electrophysiological properties of the cell, as they  
47 do in mammalian cells<sup>10</sup> (Extended Data Fig. 1C).

1           Having satisfied these assumptions, to investigate reciprocal feedback between TTFL  
2 rhythmicity and changes in potassium levels, we established a set of treatments that affect  
3  $[K^+]_i$ . Changing the concentration of extracellular potassium,  $[K^+]_e$ , induces corresponding  
4 changes in  $[K^+]_i$  (Fig. 1B).  $[K^+]_i$  can also be lowered using either caesium (Cs, a non-biological  
5 ion that competes with potassium for the same transport machinery<sup>39</sup>) or the voltage-  
6 dependent potassium ion channel inhibitor 4-aminopyridine (4-AP<sup>40</sup>). We then characterised  
7 the effect of these treatments on clock gene expression rhythms using an *in vivo*  
8 luminescence reporter of the TTFL clock gene, CCA1, fused to firefly luciferase (CCA1-LUC)<sup>41</sup>.  
9 Under constant light conditions (LL), increasing  $[K^+]_e$  dose-dependently induced long period  
10 clock gene rhythmicity compared to the standard  $[K^+]_e$  of 10 mM (Fig. 1C-D). Caesium dose-  
11 dependently induced period lengthening in media that contain the standard 10 mM  $[K^+]_e$   
12 (Fig. 1E-F). The effect of caesium can be modulated by changing extracellular potassium: a  
13 stronger effect is observed in low  $[K^+]_e$  and a reduced effect in high  $[K^+]_e$ . This further  
14 confirms that period lengthening by caesium is indeed caused via direct competition with  
15 potassium. Unlike caesium, 4-AP induced short period clock gene rhythms (Fig. 1G-H). The  
16 differential effect on period observed between caesium and 4-AP treatments, both of which  
17 lower  $[K^+]_i$  (Fig. 1B), is potentially due to their different modes of action: 4-AP acts  
18 specifically on voltage-gated potassium channels, while caesium competes with potassium  
19 non-selectively for transport and regulation of potassium-dependent intracellular  
20 processes<sup>42</sup>. Regardless, together these results reveal a direct and dose-dependent effect of  
21 potassium on the pace of the circadian TTFL.

22  
23           To explore the time-dependency of the interaction between TTFL rhythms and  
24 potassium rhythms, we performed time series of 2h pulse treatments (Extended Data Fig.  
25 1D) with low potassium under constant conditions. Interestingly, treatments at subjective  
26 dawn had no or modest effects on clock gene expression compared to controls, while  
27 treatments at subjective dusk produced a clear shift in phase (Fig. 1I). When circadian phase  
28 compared to mock treatments is analysed over a full 24 h cycle, the resulting Phase  
29 Response Curve (PRC) revealed a clear clock-gated response (Fig. 1J), with large phase shifts  
30 of up to 10 h following treatment during the early subjective night. This experiment was  
31 mirrored by 2 h pulsed treatment with a range of [4-AP], which confirmed the sensitive  
32 window during subjective night (Fig. 1J). The time of day where the greatest phase shifts are  
33 observed (Fig. 1J) coincides with the timing of peak potassium levels (Fig. 1A). These phase  
34 effects are not accompanied by large effects on circadian period (Extended Data Fig. 1E-F).  
35 Any period or phase effects described here or in the rest of this manuscript are not induced  
36 by the change in extracellular salinity: treatments used only induce minor changes in overall  
37 salinity (30-35 ppt) to which *Ostreococcus* clock gene expression is resilient (Extended Data  
38 Fig. 2A-B). Combined, these results indicate tight feedback between potassium and TTFL  
39 rhythms: potassium abundance is circadian-regulated and dose-dependently feeds back to  
40 regulate the period and phase of TTFL rhythmicity, fulfilling the definition of a regulator of  
41 cellular circadian rhythmicity.

#### 42 43 **Specific intracellular potassium concentrations are required for optimal proliferation**

44 The acute impact of reducing intracellular potassium on circadian phase during the  
45 subjective night (Fig. 1J) suggests that crucial mechanisms require the higher intracellular  
46 potassium levels found at this time (Fig. 1A). We therefore hypothesised that potassium  
47 rhythms might affect cell proliferation, as 1) cell cycle progression is tightly regulated and

1 influenced by gradual changes in intracellular potassium<sup>12</sup>, and 2) strong coupling between  
2 the cell and circadian cycles is well-known across eukaryotes, although the mechanistic basis  
3 is poorly understood<sup>7</sup>. The *Ostreococcus* cell cycle is tightly gated by the circadian clock<sup>37</sup>  
4 and the predominant phase of cell division is in the early night<sup>8</sup>. To assess the phase  
5 relationship between cell proliferation and potassium rhythms, we plotted approximate  $[K^+]_i$   
6 rhythms (from Fig. 1A) against cell cycle stages as inferred from proteome data<sup>8</sup> and found  
7 that potassium built up from S phase (DNA-synthesis) through G2 (growth 2 phase) to peak  
8 around M phase (mitosis), and receded during G1 phase (Fig. 2A).

9 In cells like *Ostreococcus* and mammals, which lack a cell wall, increases in  $[K^+]_i$   
10 without compensatory decreases in other intracellular osmolytes<sup>43</sup> will result in an  
11 associated increase in cell volume as water moves into the cell down the osmotic gradient. If  
12  $[K^+]_i$  would moderate intracellular osmolarity over the cell cycle, we predicted that cultures  
13 grown under a range of extracellular potassium concentrations would display differential  
14 cell volume and proliferation rates. Accordingly, high  $[K^+]_e$  leads to unusually large cells and  
15 low  $[K^+]_e$  to unusually small cells (Fig. 2B), both of which proliferate at a lower rate (Fig. 2C).  
16 Particularly dramatic effects are observed when increasing  $[K^+]_e$  above the homeostatic  $[K^+]_i$   
17 (Extended data Fig. 1B), reversing the direction of the potassium gradient across the cell  
18 membrane. These effects are not due to changes in the total osmolarity of media but are  
19 specific to changes in potassium, as corresponding changes in sodium do not elicit a similar  
20 effect (Extended Data Fig. 2C). To further investigate the effect of potassium on the rate of  
21 cell proliferation, we monitored proliferation under treatments that affect  $[K^+]_i$ . Changing  
22  $[K^+]_e$  or addition of caesium or 4-AP led to a reduction or even a full arrest of cell  
23 proliferation (Fig. 2D). Again, the greater effect of 4-AP on proliferation is likely a result of its  
24 specific action at blocking  $K_v1$  channels, as opposed to the general competitive, but not  
25 inhibitory, action of caesium<sup>44,45</sup>. Taken together, our results suggest that cell proliferation  
26 and cell size in *Ostreococcus tauri* are highly sensitive to intracellular potassium levels and  
27 that rhythmic potassium levels within a tight concentration range are required for peak  
28 rates of cell division.

### 30 **Reciprocal interaction between the cell and circadian cycle**

31 If cell proliferation is sensitive to a circadian rhythm in  $[K^+]_i$  (Fig. 2), a possible hypothesis is  
32 that potassium rhythms mediate coupling between the cell and circadian cycles.

33 Having established the effects of modulating  $[K^+]_i$  on clock gene expression (Fig. 1)  
34 and cell proliferation (Fig. 2), we next asked what effect modulating clock gene expression  
35 had on potassium and cell proliferation rhythms. Changing light fluence rates generally  
36 changes parameters of circadian TTFL rhythmicity<sup>46,47</sup>. We first tested the rhythmicity of the  
37 CCA1-LUC reporter under high light, low light, and darkness. We observed stable and high-  
38 amplitude gene expression rhythms under dim light (physiologically normal for  
39 *Ostreococcus*) and dampened and shorter period rhythms under high light (Fig. 3A-B). We  
40 saw no TTFL rhythmicity under complete darkness, due to the previously described  
41 inhibition of transcription under these conditions<sup>48</sup>. Rhythmicity of  $[K^+]_i$  followed TTFL  
42 rhythmicity: oscillations occur at an advanced phase under dim compared to high light (Fig.  
43 3C), while darkness induces apparent arrhythmia<sup>9</sup>. Cells subjected to different fluence rates  
44 also exhibited differential cell proliferation rates (Fig. 3D). While darkness (no clock gene  
45 expression, no potassium rhythms) led to a full cell cycle arrest as previously documented<sup>37</sup>,  
46 high light induced exceptionally high proliferation, indicating that cell proliferation can  
47 proceed unchecked when transcriptional rhythms are severely dampened. These results

1 suggest reciprocal feedback between TTFL function and potassium rhythms, which combine  
2 to regulate cell proliferation.

3 We then examined how inhibiting cell proliferation affected circadian gene  
4 expression and potassium rhythms. We used the non-protein amino acid inhibitor L-  
5 mimosine, which reversibly arrests cells at the G1/S interphase<sup>49,50</sup>. We asked whether  
6 inhibition had a differential effect under high versus dim light conditions. Following a 24h  
7 pulsed treatment (applied, then washed off), circadian gene expression was irretrievably  
8 lost under high light while it was only suppressed under dim light (Fig. 3E). Interestingly, cell  
9 proliferation was affected under high light but not dim light (Fig. 3F), indicating that  
10 inhibition of cell proliferation correlates with a lack of rhythmic gene expression. Inhibition  
11 leads to larger cell volumes under both light conditions but more strongly under high light  
12 (Extended Data Fig. 3A). As both TTFL rhythmicity and cell proliferation were inhibited by L-  
13 mimosine under high light, we then tested  $[K^+]_i$  rhythms under those conditions.  
14 Remarkably, while  $[K^+]_i$  oscillations occur at an advanced phase and elevated level,  $[K^+]_i$   
15 remains rhythmic under L-mimosine treatment (Fig. 3G). This indicates that potassium  
16 rhythms are independent of TTFL or cell cycle rhythmicity, as both these systems are  
17 arrhythmic under these conditions. This mirrors the earlier observation that potassium  
18 rhythms occur in human red blood cells<sup>10</sup>, which have no TTFL activity and do not divide.  
19

### 20 **Enforced potassium gradients are sufficient to instruct cell proliferation**

21 The results in Fig. 1-3 are consistent with potassium rhythms as a major link between  
22 circadian timing and the cell cycle. We therefore hypothesised that the effects of  
23 experimentally enforced changes in  $[K^+]_i$  on cell proliferation should depend on circadian  
24 phase. In line with this, a 2h pulsed treatment (Extended Data Fig. 3B) of 4-AP applied at  
25 subjective dawn had no effect on cell proliferation, whereas it induced a large delay when  
26 applied at subjective dusk (Fig. 4A). Conversely, when pulsed treatments with high  $[K^+]_e$   
27 were given, treatment at subjective dusk had no effect on the subsequent proliferation  
28 pattern, while at dawn, a large phase advance in proliferation is observed after some initial  
29 cell death (Fig. 4B). Notably, treatments with high  $[K^+]_e$  did not greatly affect TTFL  
30 rhythmicity at either time point (Extended Data Fig. 3C). A pulse of low  $[K^+]_e$  did not greatly  
31 affect cell proliferation when applied at subjective dusk, while it induced cell death and an  
32 arrest of cell proliferation at subjective dawn (Fig. 4B). Interestingly, these strong effects on  
33 cell proliferation at subjective dawn occurs at the opposite circadian phase as that on TTFL  
34 rhythmicity (Fig. 1I-J). These results highlight that changes in the potassium gradient are  
35 sufficient to advance or delay the timing of proliferation with respect to prior circadian  
36 phase.

37 As potassium gradients affect cell proliferation in a manner that does not necessarily  
38 relate to TTFL rhythmicity, we then asked whether potassium could also induce changes in  
39 the cell cycle under complete darkness, when gene expression, potassium, and proliferation  
40 are all arrhythmic (Fig. 3A-D). Pulse treatments with either high or low potassium do not  
41 restore TTFL rhythms under these conditions (Extended Data Fig. 3D). However, a rapid  
42 ~50% increase of the total cell number was induced by treatments either at subjective dawn  
43 or dusk (Fig. 4C). The effects in Fig. 4B-C become more obvious when plotted relative to  
44 control treatments and correcting for initial cell death (Extended Data Fig. 4E). These results  
45 establish that 1) a sudden, enforced potassium gradient is sufficient to instruct at least one  
46 round of cell division and 2) that a functional TTFL is required to deliver phase sensitivity  
47 (i.e. to correctly translate a change in potassium into committing to cell proliferation).

## 1 **Potassium affects timekeeping in mammalian cells**

2 To test the generality of our findings, we asked how closely the results from model  
3 *Ostreococcus* cells (Fig. 1-4) correspond to mammalian systems. Previous work has  
4 identified coupling between the cell cycle and circadian rhythms in vertebrates<sup>24,25,51</sup>,  
5 including direct circadian regulation of cell cycle regulators such as Wee1 kinase and  
6 cyclins<sup>25,52</sup>. Reciprocally, cell cycle regulators, including the master tumour suppressor p53,  
7 actively regulate mammalian circadian rhythmicity by repressing expression of the critical  
8 clock gene Period (PER)<sup>53</sup>.

9 First, the effects of treatment with 4-AP and caesium on the mammalian TTFL system  
10 was assessed in cells expressing circadian bioluminescence reporters. In actively dividing  
11 NIH 3T3 cells expressing luciferase under the circadian *Per2* promoter (Per2:LUC),  
12 manipulation of intracellular potassium dose-dependently lengthened circadian gene  
13 expression (Fig. 5A-D, Extended Data Fig. 4A-B). To confirm relevance of our findings in  
14 primary cells, we repeated these experiments in adult lung fibroblasts derived from the  
15 PERIOD2-LUCIFERASE (PER2-LUC) mouse, where luciferase is expressed in fusion with the  
16 endogenous PER2 protein<sup>54</sup>. In both actively dividing (Extended Data Fig. 4C-F) and  
17 confluent (Extended Data Fig. 4G-L) cells, we observed changes in period comparable to  
18 both NIH 3T3 cells as well as *Ostreococcus* cells. Next, we tested whether potassium affects  
19 clock gene expression in a circadian phase dependent manner. Treatments that affect  
20 potassium were applied at the peak versus the trough of PER2 expression in fibroblasts as  
21  $[K^+]_i$  peaks a few hours before PER2 in these cells<sup>26</sup>. Caesium treatment at the peak of PER2  
22 expression (i.e. decreasing  $[K^+]_i$  phase) did not affect phase, while treatments at the trough  
23 of PER2 (increasing  $[K^+]_i$  phase) clearly shifted circadian phase compared to controls  
24 (Extended Data Fig. 4M-N). This compares favourably to *Ostreococcus*, which also showed  
25 peak sensitivity to potassium perturbation at the time of peak  $[K^+]_i$  (Fig. 1J). In contrast, 4-AP  
26 induced phase shifts at both timepoints (Extended Data Fig. 4O-P), unlike in *Ostreococcus*  
27 (Fig. 1J). We speculate this is likely due to differences in relative expression and utilisation of  
28 voltage-gated potassium channels between the two organisms. Together, these results  
29 indicate that circadian rhythms in potassium levels in mammalian cells, as in *Ostreococcus*,  
30 feed back to regulate TTFL gene expression in a phase-dependent manner.

31

## 32 **Potassium affects cell proliferation in mammalian cells**

33 To determine whether manipulation of potassium also inhibits cell proliferation in  
34 mammalian cells, PER2-LUC fibroblasts were subjected to treatment with 4-AP or caesium at  
35 peak versus trough PER2 levels. Although cell proliferation is inhibited by potassium  
36 manipulations at either phase, a significantly greater effect is observed upon treatments at  
37 peak PER2 levels (Extended Data Fig. 5A-F). Notably, as in *Ostreococcus*, the maximal effects  
38 of these treatments on TTFL rhythmicity and on cell proliferation occur at opposite circadian  
39 phases. Overall, the results in Fig. 5A-D and Extended Data Fig. 4 and 5A-F establish that  
40 modulating potassium affects TTFL rhythmicity as well as cell proliferation in mammalian  
41 cells in a phase-dependent manner.

42 Although much weaker than that observed in *Ostreococcus*, 1:1 circadian:cell cycle  
43 coupling, such that there is one cell division per circadian cycle, was previously  
44 demonstrated in freely proliferating mammalian cells under standard culture conditions in  
45 10% serum<sup>24,25</sup>. We posited that if intracellular potassium was acting to couple these two  
46 cyclical processes, then manipulation of potassium should disrupt this coupling such that  
47 the two processes cease to run in parallel. To test this, we employed NIH 3T3 cells

1 expressing the Fucci-2A system, which allows for non-invasive imaging of cell cycle  
2 progression through expression of fluorescently-tagged fragments of Cdt1 (accumulating in  
3 G1) and Geminin (accumulating in S/G2/M)<sup>55</sup>. Single cell imaging (Supplemental Data Files 1-  
4 3) confirmed a mean period of cell division (Fig. 5E) that aligns with the circadian period of  
5 these cells (Fig. 5B, D). This conforms to previous work<sup>25</sup> that demonstrated coupling  
6 between the circadian and cell cycles in these cells under these conditions. Cells treated  
7 with 4-AP or CsCl show slower cell cycle rhythms (Fig. 5F, G), a decreased rate of  
8 proliferation (Extended Data Fig. 5G-J) and an increased proclivity towards cell cycle arrest  
9 (Extended Data Fig. 5K, L). When subjected to a range of concentrations of 4-AP or CsCl, a  
10 strong dose-dependent increase in the average cell cycle period is observed (Fig. 5H-I,  
11 coloured data points). Importantly, these increases in cell cycle period were much stronger  
12 than, and did not correlate with, the observed increase in circadian period at the same  
13 concentrations of these drugs (black data points). These results are therefore consistent  
14 with our prediction that disrupting potassium transport uncouples the circadian clock from  
15 cell cycle progression. Taken together, our results strongly suggest that loss of circadian-cell  
16 cycle coupling is a general consequence of disruption of intracellular potassium levels in  
17 mammalian cells.

## 18 19 **Discussion**

20 Previous studies have largely focused on links between cell division and the transcriptionally  
21 driven circadian TTFL. However, increasing knowledge of robust and universal circadian  
22 rhythms that continue under non-transcriptional conditions<sup>9,19,20,56</sup> demonstrate that there  
23 is a need to shift the focus to post-translational events to clearly unravel the potential link(s)  
24 between the circadian and cell cycles. Oscillatory intracellular potassium is one of these  
25 cellular properties that appear to run in parallel with TTFL rhythms. This work demonstrates  
26 that intracellular potassium levels regulate circadian rhythms and coordinate phase-  
27 dependent cell cycle progression even in the absence of transcriptional timekeeping.  
28 Furthermore, these results establish that the evolutionarily conserved circadian rhythms in  
29 potassium levels<sup>9,26</sup> are a critical factor coupling the cell and circadian cycles (Fig. 5J).

30 Our previous work showed that circadian rhythms in intracellular ion concentration  
31 buffer intracellular osmolarity in response to daily rhythms in protein synthesis and  
32 abundance in confluent cells<sup>26</sup>. Considering this, it is tempting to postulate that in  
33 proliferating cells, similar mechanisms are required to regulate cell volume changes in  
34 response to protein synthesis during G1 phase<sup>57,58</sup>. In line with this, G1 phase sees a  
35 dramatic reduction in  $[K^+]_i$  (Fig. 2A, 5J) when protein synthesis rates are highest. The  
36 increase in potassium during G2 phase, and the consequent increase in intracellular  
37 osmolarity, is likely to contribute to the ingress of water required for cell growth ahead of  
38 cytokinesis.

39 Interestingly, abnormal proliferation phenotypes and cell properties found in  
40 multiple cancer cells including glioma, hepatoblastoma, breast cancer or malignant  
41 astrocytoma are correlated with altered  $K^+$  homeostasis, or with the altered polarization  
42 profiles that these cause<sup>33-36,59-61</sup>. The inhibition of  $K^+$  transporters in tumour cells also  
43 showed a strong therapeutic potential in cancer treatments, highlighting this as a potential  
44 therapy target for cancer research<sup>59,62</sup>. It is also worth noting that disruption of circadian  
45 rhythms is permissive for the development of cancer<sup>16</sup>. The novel fundamental insights  
46 reported here into the integration of potassium rhythms, TTFL rhythms, and cell



1 proliferation can inform research into the underlying molecular regulation of these coupled  
2 systems, ultimately contributing to future cancer research and therapy.

### 3 4 **Acknowledgements**

5 The authors thank Erin Henslee and Fatima Labeed for expertise and equipment required  
6 for DEP measurements in Extended Data Figure 1C. We also thank Seth Rubin for his critical  
7 review of the manuscript, Franck Delaunay for his kind gift of Rev-Erb $\alpha$ -Venus Fucci-2A NIH  
8 3T3 cells, and David Welsh for the generous donation of PERIOD2-LUCIFERASE mouse lung  
9 tissue.

### 10 11 **Funding**

12 SGR and GvO were supported by a Wellcome Trust Discovery Award (225212/Z/22/Z) and a  
13 Leverhulme Trust Research Grant (RPG-2019-184). LLH and EG were supported by Wellcome  
14 Trust Institutional Strategic Support Fund awards to GvO. PC and CLP are supported by US  
15 NIH grant R35 GM141849. The UCSC Chemical Screening Center (RRID SCR\_021114) was  
16 supported by a National Institutes of Health High End Instrumentation Grant  
17 (1S10OD028730-01A1). AS is funded by the Deutsche Forschungsgemeinschaft (DFG) under  
18 Germany's Excellence Strategy EXC 2030 (390661388) and a project grant (510582209).

### 19 20 **Methods**

#### 21 22 ***Ostreococcus tauri* methods**

#### 23 **Bioluminescence recording**

24 Transgenic CCA1-LUC *Ostreococcus* cells<sup>41</sup> were grown in vented tissue culture flasks (Sarstedt) at  
25 20°C in artificial sea water (ASW) as described previously<sup>9</sup> with a light intensity of 17  $\mu\text{mol m}^{-2} \text{s}^{-1}$   
26 under blue light filters (183 Moonlight Blue Filter, Lee filters). Cells were entrained under 12h  
27 light/12h dark (LD) cycles for 6-7 days to reach optimal cell density for experimental use. CCA1-LUC  
28 cell cultures were diluted 1:3 in fresh ASW 30-35 ppt and supplemented with 0.2 mM D-luciferin. 90  
29  $\mu\text{L}$  was added to wells of a 384-well plate (Greiner) and imaged in a luminescence plate reader  
30 (Berthold TriStar2) under 2  $\mu\text{mol m}^{-2} \text{s}^{-1}$  blue light (183 Moonlight Blue Filter, Lee filters) for 5-7 days  
31 under constant light conditions. 4-AP (Sigma) or CsCl (Sigma) treatments were added at 10x  
32 concentration. For washout treatments, media from each well was carefully removed and replaced  
33 with media containing the appropriate treatment and luciferin, avoiding disturbing the cell  
34 aggregates. After the pulse treatments, cells were fully resuspended with fresh ASW media +  
35 luciferin. Treatments were performed on the second day of constant conditions (24h into LL or 36h  
36 into DD) and all fall within a range of overall salinity of 30-35 ppt. Salinity experiments were  
37 performed by adjusting [NaCl]. For differential light conditions, light intensity was adjusted at the  
38 start of imaging. High light = 17  $\mu\text{mol m}^{-2} \text{s}^{-1}$  and dim light = 2  $\mu\text{mol m}^{-2} \text{s}^{-1}$ . Results were analysed and  
39 plotted using GraphPad Prism v9. Period and phase analyses were performed using BioDare2<sup>63</sup> as  
40 previously published<sup>8</sup>.

#### 41 42 **Cell number and area analysis**

43 For cell number and cell area analyses, *Ostreococcus* cells subjected to identical experimental  
44 settings and conditions as for the luminescence assays were harvested and counted using a  
45 haemocytometer with a light microscope on 40x magnification. Data was collected from at least 5  
46 technical replicates for each time point. For cell area, cell samples were quickly mixed 1:1 with -80°C  
47 methanol (70%) to preserve cell volume. Pictures were taken with a light microscope from at least  
48 100 cells for each condition and cell area was measured with ImageJ.

#### 49 50 **Ion analysis**

1 For ion analyses, 25-30 ml *Ostreococcus* cell cultures were collected at stated times, pelleted, and  
2 washed twice with 1 M Sorbitol (Sigma) to remove all salts present in the media. Pellets were then  
3 resuspended in 100  $\mu$ L of 69% Nitric acid (MERCK) and digested O/N at RT. Samples were diluted to  
4 5% Nitric acid with HPLC grade water. 4 technical replicates for each time point were analysed using  
5 Microwave Plasma - Atomic Emission Spectrometry (MP-AES 4210, Agilent) as reported previously<sup>24</sup>.

## 6 7 **Dielectrophoresis**

8 For dielectrophoresis (DEP), *Ostreococcus* cultures were entrained under 14h light:10h dark cycles  
9 before transfer into constant conditions. Starting at 24h, every 4 hours, 15 mL of  $27.5 \times 10^6$  cells/mL  
10 cultures were transferred to 15 mL falcon tube and washed twice in 15 mL iso-osmotic 1 M sorbitol  
11 by centrifuging for 2 minutes at 4472 g, and then resuspended in a final volume of 0.5 mL 1 M  
12 sorbitol. 75  $\mu$ L of these cell suspensions were pipetted into 3DEP chips (DEPtech, Heathfield, UK),  
13 which were subsequently inserted into a 3DEP reader (DEPtech). Pin connections energised each  
14 well at 10 Vp-p, with a different frequency applied to each of the 20 wells and with the wells  
15 collectively energised for 10 s at five points per decade (10 kHz–20 MHz). This was repeated at each  
16 time point at least three times. The raw data were fitted with a single-shell model in order to extract  
17 the electrophysiological parameters as previously<sup>10,64</sup>, accepting spectra producing R<sup>2</sup> values of 0.9  
18 or greater.

## 19 20 **Mammalian cell methods**

### 21 **Isolation of cell lines**

22 NIH 3T3 Rev-Erb $\alpha$ -Venus FUCCI-2A cells were a gift from Franck Delaunay. NIH 3T3 Per2:LUC  
23 cells were generated previously<sup>65</sup>. PERIOD2-LUCIFERASE<sup>54</sup> lung fibroblasts were derived from  
24 mouse lung kindly donated by David Welsh. Mouse primary fibroblasts were isolated according to an  
25 established protocol<sup>66</sup>. For this, lung tissue was stored in ice-cold PBS for up to 24 hrs. Tissue  
26 samples were subsequently removed from PBS and cut in to  $\sim 1$  mm<sup>3</sup> sections using a pair of sterile  
27 scalpels, before being transferred to a 50 mL falcon tube with 10 mL “digestion medium”  
28 (DMEM/F12 supplemented with pen/strep, Mycozap Plus PR and 0.14 U/mL Liberase) and incubated  
29 at 37°C, stirring slowly, for 30 min, or until the tissue fragments turned white. The tissue fragments  
30 were then titrated using a 10 mL pipette and 40 mL “initial culture medium” (DMEM/F12,  
31 supplemented with pen/strep, Mycozap Plus PR and 15% HyClone FetalClone III) added before the  
32 tube was centrifuged at 700x g for 5 min. The resulting supernatant was discarded, the pellet  
33 resuspended in a further 20 mL “initial culture media” and the tube centrifuged for a further 5 min.  
34 The supernatant was again discarded, the pellet resuspended in 10mL “initial culture media” and  
35 transferred to a 10 cm tissue culture dish and incubated at 37°C, 5% CO<sub>2</sub>, 3% O<sub>2</sub>. After 7 days, media  
36 was refreshed and after a further 7 days, cells were split and re-plated in “selection medium” (MEM  
37 supplemented with pen/strep, non-essential amino acids, sodium pyruvate and 10% HyClone  
38 FetalClone III). After a further 2 weeks, cells were transferred to DMEM-based culture medium  
39 (DMEM supplemented with pen/strep and 10% HyClone FetalClone III). Immortalization was  
40 achieved by serial passage of cells at 37°C, 5% CO<sub>2</sub>, 20% O<sub>2</sub>. Cell lines were authenticated by  
41 observation of morphology and by continued expression of the bioluminescent reporter.

### 42 43 **Bioluminescence recording**

44 For bioluminescence assays, cells were grown to confluence in 12 well or 35mm dishes in high-  
45 glucose (27.8 mM), glutamax-containing DMEM (GIBCO) supplemented with 10% serum (HyClone  
46 FetalClone III, Themofisher) and pen/strep and subjected to temperature cycles of 12 hours 37°C  
47 followed by 12 hours at 32°C. Confluent cultures were kept for up to 4 weeks with media refreshed  
48 every 7-10 days. For recording, cells were changed to MOPS-buffered “Air Media” (Bicarbonate-free  
49 DMEM, 5mg/mL glucose, 0.35 mg/mL sodium bicarbonate, 0.02 M MOPS, 100  $\mu$ g/mL pen/strep, 1%  
50 Glutamax, 1 mM luciferin, pH 7.4, 325 mOsm)<sup>67</sup>. 10% serum was used in all cases except for low [K]<sub>e</sub>  
51 experiments. Cells were then transferred to a Lumicycle (Actimetrics) or an ALLIGATOR (Cairn

1 Research), where bioluminescent activity was recorded at 15 min intervals using an electron  
2 multiplying charge-coupled device (EM-CCD) at constant 37°C. For treatment, cells were removed  
3 from recording on a heatpad and kept at constant 37°C for treatment before returning to recording.  
4 Detrending of bioluminescent traces, where appropriate, was performed using a 24 h moving  
5 average detrend. Bioluminescent traces from mammalian cells were fitted with damped cosine  
6 waves in Prism 10 (GraphPad) using the following equation:

$$y = mx + c + \text{Amplitude} \cdot e^{-kx} \cdot \cos(2\pi(x - \text{phase})/\text{period})$$

8  
9 where y is the signal, x the corresponding time, amplitude is the height of the peak of the waveform  
10 above the trend line, k is the decay constant (such that 1/k is the half-life), phase is the shift relative  
11 to a cos wave and the period is the time taken for a complete cycle to occur.

### 12 13 **Fluorescence imaging and analysis**

14 For fluorescence cell imaging of Rev-Erb $\alpha$ -Venus FUCCI-2A NIH 3T3s, cells were plated to ~7%  
15 confluency in a black, clear-bottomed 96-well plate in MOPS-buffered 'Air media' with 10% serum  
16 but lacking luciferin (see above) with the indicated concentrations of CsCl, NaCl or 4AP. Cells were  
17 then maintained at constant 37°C for 36 hours before moving to an Opera Phenix Plus (Revvity  
18 Perkin Elmer, at the UCSC Chemical Screening Center RRID SCR\_021114)) for recording at constant  
19 37°C in a humidified, dark environment. Cells were imaged every 18 minutes with 9 fields of view per  
20 well, using a 10x air objective, two peak focusing at the -5  $\mu$ m focal plane, 50  $\mu$ m pinhole spinning  
21 disc, 2160x2160 px camera, binning 2, and the following channels: brightfield with transmitted light  
22 and a 650-760 nm filter with 20 ms exposure at 20% light power; MKO2 with a 561 nm excitation  
23 laser and a 571-596 nm emission filter with 60 ms exposure at 95% laser power; and E2-Crimson  
24 with a 640 nm laser and a 650-760 nm emission filter with 800 ms exposure at 95% laser power.

25 For fluorescence imaging of PER2-LUC fibroblasts, cells were plated to ~7% confluency in a  
26 black, clear-bottomed 96 well plate in high-glucose (27.8 mM), glutamax-containing DMEM (GIBCO)  
27 supplemented with 10% serum (HyClone FetalClone III, Themofisher) and pen/strep and maintained  
28 under temperature cycles as described above. After 24 hours, they were treated with Cell Tracker  
29 Red CMTPX Dye (Thermo Fisher) for 30 minutes before changing to MOPS-buffered 'Air medium'  
30 with 10% serum but lacking luciferin and moving to an Opera Phenix Plus (Revvity Perkin Elmer, at  
31 the UCSC Chemical Screening Center RRID SCR\_021114)) for recording at constant 37°C in a  
32 humidified environment. Cells were imaged every 15 minutes using the same hardware as described  
33 above for Rev-Erb $\alpha$ -Venus FUCCI-2A 3T3s, except the focal plane was at -8  $\mu$ m and the following  
34 channels: brightfield with transmitted light and a 650-760 nm filter with 100 ms exposure at 40%  
35 light power; Cell Tracker Red with a 561 nm excitation laser and a 570-630 nm emission filter with  
36 100 ms exposure at 95% laser power.

37 Fluorescence image analysis of 3T3s and primary fibroblasts was performed using the cell  
38 tracking feature of Harmony 5.1 high-content imaging and analysis software (Revvity Perkin Elmer,  
39 at the UCSC Chemical Screening Center (RRID SCR\_021114)). For Rev-Erb $\alpha$ -Venus FUCCI-2A 3T3s, the  
40 images were flatfield corrected, the sum of the three fluorescent channels calculated, and a sliding  
41 parabola applied, from which nuclei were identified, nuclei intersecting with the image border  
42 removed, the nuclei then tracked (with tracked nuclei requiring an overlap of at least 1% between  
43 sequential images), and the intensities of the three fluorescent channels measured for each nucleus.  
44 For subsequent analysis, only cells with continuous tracks longer than 200 images were used.  
45 Senescent cells were defined as those cells that did not undergo a cell division event during the  
46 recording, determined as those cells which did not complete a cycle of cdt1 and geminin expression  
47 from the FUCCI-2A reporter. Period of cell division was determined from those cells that underwent  
48 at least two full cycles of cell-cycle gene expression, with period quantification performed using  
49 BioDare 2<sup>60</sup>.

1           For Cell Tracker Red images, PER2-LUC fibroblasts were tracked as described above for the  
2 3T3s except the Cell Tracker Red raw image was used for cell identification, and the number of cells  
3 was outputted.

4

5 **Statistics**

6 All statistical analysis was performed using Prism 10 (GraphPad).

7

8

## 1 Legends

2

3 **Figure 1. Potassium rhythms feed back to the circadian system.** A) Quantification of intracellular  
4 potassium, magnesium, and calcium concentrations in extracts taken over a time series under constant  
5 light conditions. Line represents a sine wave fitted through data points. n=4, mean±SEM. B) Changes in  
6 intracellular potassium levels can be induced by exogenous treatments. Samples collected after 16-18h of  
7 treatment. n=4, mean±SEM, one-way ANOVA, Dunnett's multiple comparisons test vs. mock. C-D)  
8 Changes to circadian period quantified using the CCA1-LUC marker at different extracellular potassium  
9 concentrations, as example traces (C) or expressed as a dose response curve (D). n=16, mean±SEM, one-  
10 way ANOVA, Dunnett's multiple comparisons test vs. 10 mM K<sup>+</sup> control. E-F) Example traces (E) and dose  
11 response curve (F) for the effect of caesium on circadian period in media containing normal (10 mM), low  
12 (1 mM), or high (30 mM) extracellular potassium. n=8, mean±SEM, two-way ANOVA, caesium factor  
13 72.2% of variation, Tukey's multiple comparisons test. G-H) Example traces (G) and dose-response curve  
14 (H) for the effect of 4-AP on circadian period. n=8, mean±SEM, one-way ANOVA, Dunnett's multiple  
15 comparisons test vs. mock. I) Examples of phase changes of the CCA1-LUC marker following low  
16 potassium pulses (orange dotted line) at 24h (subjective dawn, top) versus 36h (subjective dusk, bottom)  
17 under constant conditions. n=12. J) Phase response curves to pulse treatments with low extracellular  
18 potassium (blue) or saturating concentrations (1.5mM) of 4-AP (orange) in constant light. n=12,  
19 mean±SEM, one-way ANOVA, Tukey's multiple comparisons test. P value summary only shown due to  
20 large number of comparisons. In A and J, grey area indicates subjective night. In D, F, H and J, period or  
21 phase changes are relative to control treatments.

22

23 **Figure 2. Cell proliferation is tuned by intracellular potassium concentration.** A) Diagram indicating the  
24 phase correlation of rhythms in intracellular potassium concentration inferred from Figure 1A (blue  
25 dotted line), and the cell cycle phases inferred from proteome data<sup>8</sup>. Day and night phases are indicated  
26 by light and dark boxes. B-C) Cell size (B, n=50) or number (C, n=5) of cells grown for 5 days under  
27 differential potassium concentrations. Mean±SEM, one-way ANOVA, Dunnett's multiple comparisons test  
28 vs. 10 mM K<sup>+</sup> control. D) Cell proliferation of cells subjected to a range of potassium concentrations (left)  
29 or treatment with caesium or 4-AP (right), normalised to starting density. Grey areas represent subjective  
30 night periods. n=10, mean±SEM, Dunnett's multiple comparison test vs 10mM K<sup>+</sup> or mock control.

31

32 **Figure 3. Reciprocal relationship between TTFL, potassium, and cell proliferation rhythms.** A)  
33 Luminescence imaging of the clock reporter CCA1-LUC under different fluence rates. High light=16  
34  $\mu\text{moles}/\text{m}^2/\text{sec}$ ; dim light=2  $\mu\text{moles}/\text{m}^2/\text{sec}$ . n=10, mean±SEM. B) Quantification of period and phase of  
35 luminescence traces in (A); blue=dim light and black=high light. n=10, mean±SEM, two-way ANOVA. C)  
36 Intracellular potassium levels over time under high versus dim light conditions. n=3. Orange dotted line is  
37 a fit through previously published data from darkness<sup>9</sup>. Phase change provided for dim light vs. high light.  
38 D) Cell proliferation under different fluence rates. High and low light conditions fit to logistic growth  
39 curve, darkness preferentially fits to a straight line, extra sum-of-squares F-test, n=5. E) Luminescence of  
40 CCA1-LUC cultures under high (left panel) versus dim light (right panel), following a 24h treatment with  
41 3.2 mM L-mimosine. n=14, mean±SEM. F) Cell proliferation of cultures subjected to the identical  
42 treatments as (E), counted one day after release of treatment. Unpaired t-test, Holm-Sidak, n=5, mean  
43 ±SEM. G) Potassium content of cultures subjected to L-mimosine versus controls under high light. Phase  
44 change provided for treated vs. mock conditions. High light control repeated from 3C. n=3, mean±SEM.

45

46 **Figure 4. Potassium is sufficient to instruct cell division.** A-B) Cell number upon 2h pulsed treatments  
47 with 4-AP (A) or low/high potassium (B) at subjective dawn (left panels) versus subjective dusk (right  
48 panels) under constant light conditions. C) Cell number upon 2h pulsed treatments with low/high  
49 potassium at subjective dawn (left panel) versus subjective dusk (right panel) under constant darkness. In  
50 all panels, darker areas represent subjective night and lighter areas subjective day; orange dotted lines  
51 indicate treatment times. n=6, mean±SEM, two-way ANOVA, Dunnett's multiple comparisons test vs.

1 control. Significance markers in middle of line or brackets indicate regions of a line that differ from  
2 control, significance markers at the end of a line indicate that all points on a line differ from control.

### 3 4 **Figure 5. Potassium regulates both cell and circadian cycles in mammalian cells**

5 A-D) Actively dividing Per2:LUC NIH 3T3s treated with increasing concentrations of 4AP (A-B) or CsCl (C-D)  
6 show increasing circadian period. n=3, mean±SEM, one-way ANOVA, Dunnett's multiple comparisons test  
7 vs. control. E-G) Representative traces of FUCCI markers from NIH 3T3s under control conditions (E) or  
8 treated with 2 mM 4AP (F) or 12 mM CsCl (G). H-I) Comparison of the change in period of the circadian  
9 marker and cell cycle marker under increasing concentrations of 4-AP (H) or CsCl (I). n≥21 nuclei taken  
10 from at least 3 independent wells, mean±SEM. Fisher's LSD test. J) A general model for the relationship  
11 between potassium rhythms and cell division.

### 12 13 **Extended Data Figure 1. The *Ostreococcus ionome***

14 A) MP-AES quantification of intracellular ions at subjective day versus subjective night in constant light  
15 conditions. n=3, mean±SEM, two-way ANOVA with Holm-Sidak's multiple comparisons. B) Potassium  
16 concentrations in extracts were converted to intracellular concentration by correcting dilution rate,  
17 total cell number in each sample, and the known average cell volume<sup>68</sup>. Known concentrations in  
18 artificial sea water are provided. C) Dielectrophoresis results show rhythmicity in the electrophysiological  
19 properties of the cell ( $\sigma_{\text{cyt}}$  = cytoplasmic conductivity;  $G_{\text{eff}}$  = effective membrane conductance). D)  
20 Schematic representation of treatments in main Figure 1J-I. E-F) Period analyses of the phase response  
21 curves in Fig. 1J (E: low potassium, F: 4-AP). n=12, box and whiskers; min to max.

### 22 23 **Extended Data Figure 2. *Ostreococcus* is insensitive to moderate changes in extracellular salinity**

24 A) Period analyses of luminescence traces under constant light conditions of CCA1-LUC cells subjected to  
25 media with differential salinity. n=8, mean±SEM, one-way ANOVA with pairwise comparisons to control  
26 conditions (30ppt). B) Cell counting of cells subjected to with differential salinity. n=4, mean±SEM, one  
27 way ANOVA with pairwise comparisons to control conditions (30ppt) for endpoint only. For A-B:  
28 potassium treatments performed throughout this manuscript do not exceed the salinity range of 30-  
29 35ppt (indicated by orange shading), showing no significant changes in circadian rhythms or cell division.

### 30 31 **Extended Data Figure 3. Additional treatments of *Ostreococcus* cells**

32 A) Light microscopy pictures (left; each panel is composed of six separate pictures) and quantification of  
33 cell size changes (right) upon treatment with 3.2mM L-mimosine in high versus dim light. n=15,  
34 mean±SEM, one-way ANOVA with pairwise comparisons. B) Diagram depicting the experimental designs  
35 of treatment pulses in Fig. 4. C) Luminescent imaging of CCA1-LUC cells subjected to 2h pulses of high  
36 potassium under constant light at subjective dawn (left panel) versus dusk (right panel). Treatment time  
37 indicated by orange dotted line. n=16, mean±SEM. D) Luminescent imaging of CCA1-LUC cells subjected  
38 to 2h pulses of low/high potassium under darkness. n=8, mean±SEM. E) Changes in cell number under  
39 light (functional TTFL) versus darkness (no TTFL) in response to pulsed treatments with low (bottom) or  
40 high potassium (top); identical data as in main Figure 4B and C, but expressed relative to the control mock  
41 treatments and corrected for initial cell death.

### 42 43 **Extended Data Figure 4. Effect of potassium manipulation on mammalian circadian period and phase**

44 A) Actively dividing Per2:LUC NIH 3T3s treated with increasing concentrations of 4-AP show increasing  
45 circadian period. n=3, mean±SEM. Extended from Fig. 5A. B) Actively dividing Per2:LUC NIH 3T3s treated  
46 with increasing concentrations of CsCl show increasing circadian period. n=3, mean±SEM. Extended from  
47 Fig. 5C. C-D) Actively dividing PER2-LUC fibroblasts treated with increasing concentrations of 4-AP show  
48 increasing circadian period. n=3, mean±SEM, asymmetric dose-response curve. E-F) Actively dividing  
49 PER2-LUC fibroblasts treated with increasing concentrations of CsCl show increasing circadian period.  
50 n=3, mean±SEM, asymmetric dose-response curve. G-H) Confluent PER2-LUC fibroblasts treated with  
51 increasing concentrations of 4-AP show increasing circadian period. n=3, mean±SEM, asymmetric dose-

1 response curve. I-J) Confluent PER2-LUC fibroblasts treated with increasing concentrations of CsCl show  
2 increasing circadian period. n=3, mean±SEM, asymmetric dose-response curve. K-L) Confluent PER2-LUC  
3 fibroblasts treated with increasing concentrations of extracellular potassium show increasing circadian  
4 period. n=3, mean±SEM, asymmetric dose-response curve. M) Treatment with 6 mM CsCl induces a shift  
5 in circadian phase that varies with phase of application. n=3, mean±SEM. N) Quantification of phase shift  
6 versus NaCl control, t-test. O) Treatment with 1 mM 4-AP induces a shift in circadian phase that varies  
7 with phase of application. n=3, mean±SEM. P) Quantification of phase shift versus vehicle control, t-test.

8

9 **Extended Data Figure 5. Effect of potassium manipulation on mammalian cell proliferation**

10 A-C) Treatment of actively dividing PER2-LUC fibroblasts with 1 mM 4-AP at different phases results in  
11 differing effects on subsequent log-phase proliferation rate. n≥4, mean±SEM, Šidák's multiple  
12 comparison's test. D-F) Treatment of actively dividing PER2-LUC fibroblasts with 6 mM CsCl at different  
13 phases results in differing effects on subsequent log-phase proliferation rate. n≥4, mean±SEM, Šidák's  
14 multiple comparison's test. G-H) Treatment of phase-unsynchronised FUCCI-2A NIH 3T3s with 4-AP  
15 reduces proliferation rate in a dose-dependent manner. n≥4, mean±SEM, Dunnett's multiple comparisons  
16 test. I-J) Treatment of phase-unsynchronised FUCCI-2A NIH 3T3s with 4-AP reduces proliferation rate in a  
17 dose-dependent manner. n≥4, mean±SEM, Dunnett's multiple comparisons test. K-L) Percentage of cells  
18 that failed to complete a division event under increasing concentrations of 4-AP (K) or CsCl (L). n=3,  
19 mean±SEM, Dunnett's multiple comparisons test.

20

## 1 References

- 2 1 Zhang, R., Lahens, N. F., Ballance, H. I., Hughes, M. E. & Hogenesch, J. B. A circadian  
3 gene expression atlas in mammals: implications for biology and medicine. *Proc Natl*  
4 *Acad Sci U S A* **111**, 16219-16224, doi:10.1073/pnas.1408886111 (2014).
- 5 2 Anafi, R. C., Francey, L. J., Hogenesch, J. B. & Kim, J. CYCLOPS reveals human  
6 transcriptional rhythms in health and disease. *Proc Natl Acad Sci U S A* **114**, 5312-  
7 5317, doi:10.1073/pnas.1619320114 (2017).
- 8 3 Roenneberg, T. & Mewes, M. The Circadian Clock and Human Health. *Curr Biol* **26**,  
9 R432-443, doi:10.1016/j.cub.2016.04.011 (2016).
- 10 4 Ye, Y. *et al.* The Genomic Landscape and Pharmacogenomic Interactions of Clock  
11 Genes in Cancer Chronotherapy. *Cell Syst* **6**, 314-328 e312,  
12 doi:10.1016/j.cels.2018.01.013 (2018).
- 13 5 Chen, Z., Yoo, S. H. & Takahashi, J. S. Development and Therapeutic Potential of  
14 Small-Molecule Modulators of Circadian Systems. *Annu Rev Pharmacol Toxicol* **58**,  
15 231-252, doi:10.1146/annurev-pharmtox-010617-052645 (2018).
- 16 6 Rijo-Ferreira, F. & Takahashi, J. S. Genomics of circadian rhythms in health and  
17 disease. *Genome Med* **11**, 82, doi:10.1186/s13073-019-0704-0 (2019).
- 18 7 Farshadi, E., van der Horst, G. T. J. & Chaves, I. Molecular Links between the  
19 Circadian Clock and the Cell Cycle. *J Mol Biol* **432**, 3515-3524,  
20 doi:10.1016/j.jmb.2020.04.003 (2020).
- 21 8 Kay, H. *et al.* Deep-coverage spatiotemporal proteome of the picoeukaryote  
22 *Ostreococcus tauri* reveals differential effects of environmental and endogenous 24-  
23 hour rhythms. *Commun Biol* **4**, 1147, doi:10.1038/s42003-021-02680-3 (2021).
- 24 9 Feeney, K. A. *et al.* Daily magnesium fluxes regulate cellular timekeeping and energy  
25 balance. *Nature* **532**, 375-379, doi:10.1038/nature17407 (2016).
- 26 10 Henslee, E. A. *et al.* Rhythmic potassium transport regulates the circadian clock in  
27 human red blood cells. *Nat Commun* **8**, 1978, doi:10.1038/s41467-017-02161-4  
28 (2017).
- 29 11 Huang, X. & Jan, L. Y. Targeting potassium channels in cancer. *J Cell Biol* **206**, 151-  
30 162, doi:10.1083/jcb.201404136 (2014).
- 31 12 Urrego, D., Tomczak, A. P., Zahed, F., Stuhmer, W. & Pardo, L. A. Potassium channels  
32 in cell cycle and cell proliferation. *Philos Trans R Soc Lond B Biol Sci* **369**, 20130094,  
33 doi:10.1098/rstb.2013.0094 (2014).
- 34 13 Patke, A., Young, M. W. & Axelrod, S. Molecular mechanisms and physiological  
35 importance of circadian rhythms. *Nat Rev Mol Cell Biol* **21**, 67-84,  
36 doi:10.1038/s41580-019-0179-2 (2020).
- 37 14 Harmer, S. L. The circadian system in higher plants. *Annu Rev Plant Biol* **60**, 357-377,  
38 doi:10.1146/annurev.arplant.043008.092054 (2009).
- 39 15 Gabriel, B. M. & Zierath, J. R. Circadian rhythms and exercise - re-setting the clock in  
40 metabolic disease. *Nat Rev Endocrinol* **15**, 197-206, doi:10.1038/s41574-018-0150-x  
41 (2019).
- 42 16 Lee, Y. Roles of circadian clocks in cancer pathogenesis and treatment. *Exp Mol Med*  
43 **53**, 1529-1538, doi:10.1038/s12276-021-00681-0 (2021).
- 44 17 Salgado-Delgado, R. C. *et al.* Shift work or food intake during the rest phase  
45 promotes metabolic disruption and desynchrony of liver genes in male rats. *PLoS*  
46 *One* **8**, e60052, doi:10.1371/journal.pone.0060052 (2013).



- 1 18 Scheer, F. A., Hilton, M. F., Mantzoros, C. S. & Shea, S. A. Adverse metabolic and  
2 cardiovascular consequences of circadian misalignment. *Proc Natl Acad Sci U S A*  
3 **106**, 4453-4458, doi:10.1073/pnas.0808180106 (2009).
- 4 19 O'Neill, J. S. & Reddy, A. B. Circadian clocks in human red blood cells. *Nature* **469**,  
5 498-503, doi:10.1038/nature09702 (2011).
- 6 20 O'Neill, J. S. *et al.* Circadian rhythms persist without transcription in a eukaryote.  
7 *Nature* **469**, 554-558, doi:10.1038/nature09654 (2011).
- 8 21 Yan, J. & Goldbeter, A. Robust synchronization of the cell cycle and the circadian  
9 clock through bidirectional coupling. *J R Soc Interface* **16**, 20190376,  
10 doi:10.1098/rsif.2019.0376 (2019).
- 11 22 Martins, B. M. C., Tooke, A. K., Thomas, P. & Locke, J. C. W. Cell size control driven by  
12 the circadian clock and environment in cyanobacteria. *Proc Natl Acad Sci U S A* **115**,  
13 E11415-E11424, doi:10.1073/pnas.1811309115 (2018).
- 14 23 Yang, Q., Pando, B. F., Dong, G., Golden, S. S. & van Oudenaarden, A. Circadian gating  
15 of the cell cycle revealed in single cyanobacterial cells. *Science* **327**, 1522-1526,  
16 doi:10.1126/science.1181759 (2010).
- 17 24 Bieler, J. *et al.* Robust synchronization of coupled circadian and cell cycle oscillators  
18 in single mammalian cells. *Mol Syst Biol* **10**, 739, doi:10.15252/msb.20145218  
19 (2014).
- 20 25 Feillet, C. *et al.* Phase locking and multiple oscillating attractors for the coupled  
21 mammalian clock and cell cycle. *Proc Natl Acad Sci U S A* **111**, 9828-9833,  
22 doi:10.1073/pnas.1320474111 (2014).
- 23 26 Stangherlin, A. *et al.* Compensatory ion transport buffers daily protein rhythms to  
24 regulate osmotic balance and cellular physiology. *Nat Commun* **12**, 6035,  
25 doi:10.1038/s41467-021-25942-4 (2021).
- 26 27 Stone, M. S., Martyn, L. & Weaver, C. M. Potassium Intake, Bioavailability,  
27 Hypertension, and Glucose Control. *Nutrients* **8**, doi:10.3390/nu8070444 (2016).
- 28 28 Wang, Y. & Wu, W. H. Potassium transport and signaling in higher plants. *Annu Rev*  
29 *Plant Biol* **64**, 451-476, doi:10.1146/annurev-arplant-050312-120153 (2013).
- 30 29 Choe, S. Potassium channel structures. *Nat Rev Neurosci* **3**, 115-121,  
31 doi:10.1038/nrn727 (2002).
- 32 30 Marakhova, I. *et al.* Intracellular K(+) and water content in human blood lymphocytes  
33 during transition from quiescence to proliferation. *Sci Rep* **9**, 16253,  
34 doi:10.1038/s41598-019-52571-1 (2019).
- 35 31 Cochrane, T. T. & Cochrane, T. A. The vital role of potassium in the osmotic  
36 mechanism of stomata aperture modulation and its link with potassium deficiency.  
37 *Plant Signal Behav* **4**, 240-243, doi:10.4161/psb.4.3.7955 (2009).
- 38 32 Pivovarov, A. S., Calahorra, F. & Walker, R. J. Na(+)/K(+)-pump and neurotransmitter  
39 membrane receptors. *Invert Neurosci* **19**, 1, doi:10.1007/s10158-018-0221-7 (2018).
- 40 33 Chin, L. S. *et al.* 4-Aminopyridine causes apoptosis and blocks an outward rectifier K+  
41 channel in malignant astrocytoma cell lines. *J Neurosci Res* **48**, 122-127 (1997).
- 42 34 Kim, J. A. *et al.* Ca<sup>2+</sup> influx mediates apoptosis induced by 4-aminopyridine, a K+  
43 channel blocker, in HepG2 human hepatoblastoma cells. *Pharmacology* **60**, 74-81,  
44 doi:10.1159/000028350 (2000).
- 45 35 Wang, W., Xiao, J., Adachi, M., Liu, Z. & Zhou, J. 4-aminopyridine induces apoptosis  
46 of human acute myeloid leukemia cells via increasing [Ca<sup>2+</sup>]<sub>i</sub> through P2X7 receptor  
47 pathway. *Cell Physiol Biochem* **28**, 199-208, doi:10.1159/000331731 (2011).

- 1 36 Huang, L., Li, B., Li, W., Guo, H. & Zou, F. ATP-sensitive potassium channels control  
2 glioma cells proliferation by regulating ERK activity. *Carcinogenesis* **30**, 737-744,  
3 doi:10.1093/carcin/bgp034 (2009).
- 4 37 Moulager, M. *et al.* Light-dependent regulation of cell division in *Ostreococcus*:  
5 evidence for a major transcriptional input. *Plant Physiol* **144**, 1360-1369,  
6 doi:10.1104/pp.107.096149 (2007).
- 7 38 Hedges, S. B., Dudley, J. & Kumar, S. TimeTree: a public knowledge-base of  
8 divergence times among organisms. *Bioinformatics* **22**, 2971-2972,  
9 doi:10.1093/bioinformatics/btl505 (2006).
- 10 39 Adams, E., Miyazaki, T., Saito, S., Uozumi, N. & Shin, R. Cesium Inhibits Plant Growth  
11 Primarily Through Reduction of Potassium Influx and Accumulation in Arabidopsis.  
12 *Plant Cell Physiol* **60**, 63-76, doi:10.1093/pcp/pcy188 (2019).
- 13 40 Choquet, D. & Korn, H. Mechanism of 4-aminopyridine action on voltage-gated  
14 potassium channels in lymphocytes. *J Gen Physiol* **99**, 217-240,  
15 doi:10.1085/jgp.99.2.217 (1992).
- 16 41 Corellou, F. *et al.* Clocks in the green lineage: comparative functional analysis of the  
17 circadian architecture of the picoeukaryote *ostreococcus*. *Plant Cell* **21**, 3436-3449,  
18 doi:10.1105/tpc.109.068825 (2009).
- 19 42 Hampton, C. R. *et al.* Cesium toxicity in Arabidopsis. *Plant Physiol* **136**, 3824-3837,  
20 doi:10.1104/pp.104.046672 (2004).
- 21 43 Watson, J. L. *et al.* Macromolecular condensation buffers intracellular water  
22 potential. *Nature*, doi:10.1038/s41586-023-06626-z (2023).
- 23 44 Armstrong, C. M. & Loboda, A. A model for 4-aminopyridine action on K channels:  
24 similarities to tetraethylammonium ion action. *Biophys J* **81**, 895-904,  
25 doi:10.1016/S0006-3495(01)75749-9 (2001).
- 26 45 Rodriguez-Rangel, S., Bravin, A. D., Ramos-Torres, K. M., Brugarolas, P. & Sanchez-  
27 Rodriguez, J. E. Structure-activity relationship studies of four novel 4-aminopyridine  
28 K(+) channel blockers. *Sci Rep* **10**, 52, doi:10.1038/s41598-019-56245-w (2020).
- 29 46 Aschoff, J. Circadian rhythms: influences of internal and external factors on the  
30 period measured in constant conditions. *Z Tierpsychol* **49**, 225-249,  
31 doi:10.1111/j.1439-0310.1979.tb00290.x (1979).
- 32 47 McWatters, H. G. & Devlin, P. F. Timing in plants--a rhythmic arrangement. *FEBS Lett*  
33 **585**, 1474-1484, doi:10.1016/j.febslet.2011.03.051 (2011).
- 34 48 O'Neill, J. S. *et al.* Circadian rhythms persist without transcription in a eukaryote.  
35 *Nature* **469**, 554-558, doi:10.1038/nature09654 (2011).
- 36 49 Park, S. Y. *et al.* Mimosine arrests the cell cycle prior to the onset of DNA replication  
37 by preventing the binding of human Ctf4/And-1 to chromatin via Hif-1alpha  
38 activation in HeLa cells. *Cell Cycle* **11**, 761-766, doi:10.4161/cc.11.4.19209 (2012).
- 39 50 Planchais, S., Glab, N., Inze, D. & Bergounioux, C. Chemical inhibitors: a tool for plant  
40 cell cycle studies. *FEBS Lett* **476**, 78-83, doi:10.1016/s0014-5793(00)01675-6 (2000).
- 41 51 Laranjeiro, R., Tamai, T. K., Letton, W., Hamilton, N. & Whitmore, D. Circadian Clock  
42 Synchronization of the Cell Cycle in Zebrafish Occurs through a Gating Mechanism  
43 Rather Than a Period-phase Locking Process. *J Biol Rhythms* **33**, 137-150,  
44 doi:10.1177/0748730418755583 (2018).
- 45 52 Matsuo, T. *et al.* Control mechanism of the circadian clock for timing of cell division  
46 in vivo. *Science* **302**, 255-259, doi:10.1126/science.1086271 (2003).

- 1 53 Miki, T., Matsumoto, T., Zhao, Z. & Lee, C. C. p53 regulates Period2 expression and  
2 the circadian clock. *Nat Commun* **4**, 2444, doi:10.1038/ncomms3444 (2013).
- 3 54 Yoo, S. H. *et al.* PERIOD2::LUCIFERASE real-time reporting of circadian dynamics  
4 reveals persistent circadian oscillations in mouse peripheral tissues. *Proc Natl Acad*  
5 *Sci U S A* **101**, 5339-5346, doi:10.1073/pnas.0308709101 (2004).
- 6 55 Mort, R. L. *et al.* Fucci2a: a bicistronic cell cycle reporter that allows Cre mediated  
7 tissue specific expression in mice. *Cell Cycle* **13**, 2681-2696,  
8 doi:10.4161/15384101.2015.945381 (2014).
- 9 56 O'Neill, J. S., Maywood, E. S. & Hastings, M. H. Cellular mechanisms of circadian  
10 pacemaking: beyond transcriptional loops. *Handbook of experimental pharmacology*,  
11 67-103, doi:10.1007/978-3-642-25950-0\_4 (2013).
- 12 57 Lanz, M. C. *et al.* Increasing cell size remodels the proteome and promotes  
13 senescence. *Mol Cell* **82**, 3255-3269 e3258, doi:10.1016/j.molcel.2022.07.017 (2022).
- 14 58 Zatulovskiy, E., Zhang, S., Berenson, D. F., Topacio, B. R. & Skotheim, J. M. Cell  
15 growth dilutes the cell cycle inhibitor Rb to trigger cell division. *Science* **369**, 466-471,  
16 doi:10.1126/science.aaz6213 (2020).
- 17 59 Pardo, L. A. & Stuhmer, W. The roles of K(+) channels in cancer. *Nat Rev Cancer* **14**,  
18 39-48, doi:10.1038/nrc3635 (2014).
- 19 60 Breuer, E. K. *et al.* Potassium channel activity controls breast cancer metastasis by  
20 affecting beta-catenin signaling. *Cell Death Dis* **10**, 180, doi:10.1038/s41419-019-  
21 1429-0 (2019).
- 22 61 Iorio, J., Petroni, G., Duranti, C. & Lastraioli, E. Potassium and Sodium Channels and  
23 the Warburg Effect: Biophysical Regulation of Cancer Metabolism. *Bioelectricity* **1**,  
24 188-200, doi:10.1089/bioe.2019.0017 (2019).
- 25 62 Woodfork, K. A., Wonderlin, W. F., Peterson, V. A. & Strobl, J. S. Inhibition of ATP-  
26 sensitive potassium channels causes reversible cell-cycle arrest of human breast  
27 cancer cells in tissue culture. *J Cell Physiol* **162**, 163-171,  
28 doi:10.1002/jcp.1041620202 (1995).
- 29 63 Zielinski, T., Moore, A. M., Troup, E., Halliday, K. J. & Millar, A. J. Strengths and  
30 limitations of period estimation methods for circadian data. *PLoS One* **9**, e96462,  
31 doi:10.1371/journal.pone.0096462 (2014).
- 32 64 Hoettges, K. F. *et al.* Dielectrophoresis-activated multiwell plate for label-free high-  
33 throughput drug assessment. *Anal Chem* **80**, 2063-2068, doi:10.1021/ac702083g  
34 (2008).
- 35 65 Michael, A. K. *et al.* Cancer/Testis Antigen PASD1 Silences the Circadian Clock. *Mol*  
36 *Cell* **58**, 743-754, doi:10.1016/j.molcel.2015.03.031 (2015).
- 37 66 Seluanov, A., Vaidya, A. & Gorbunova, V. Establishing primary adult fibroblast  
38 cultures from rodents. *J Vis Exp*, doi:10.3791/2033 (2010).
- 39 67 Crosby, P., Hoyle, N. P. & O'Neill, J. S. Flexible Measurement of Bioluminescent  
40 Reporters Using an Automated Longitudinal Luciferase Imaging Gas- and  
41 Temperature-optimized Recorder (ALLIGATOR). *J Vis Exp*, doi:10.3791/56623 (2017).
- 42 68 Henderson, G. P., Gan, L. & Jensen, G. J. 3-D ultrastructure of *O. tauri*: electron  
43 cryotomography of an entire eukaryotic cell. *PLoS One* **2**, e749,  
44 doi:10.1371/journal.pone.0000749 (2007).
- 45  
46

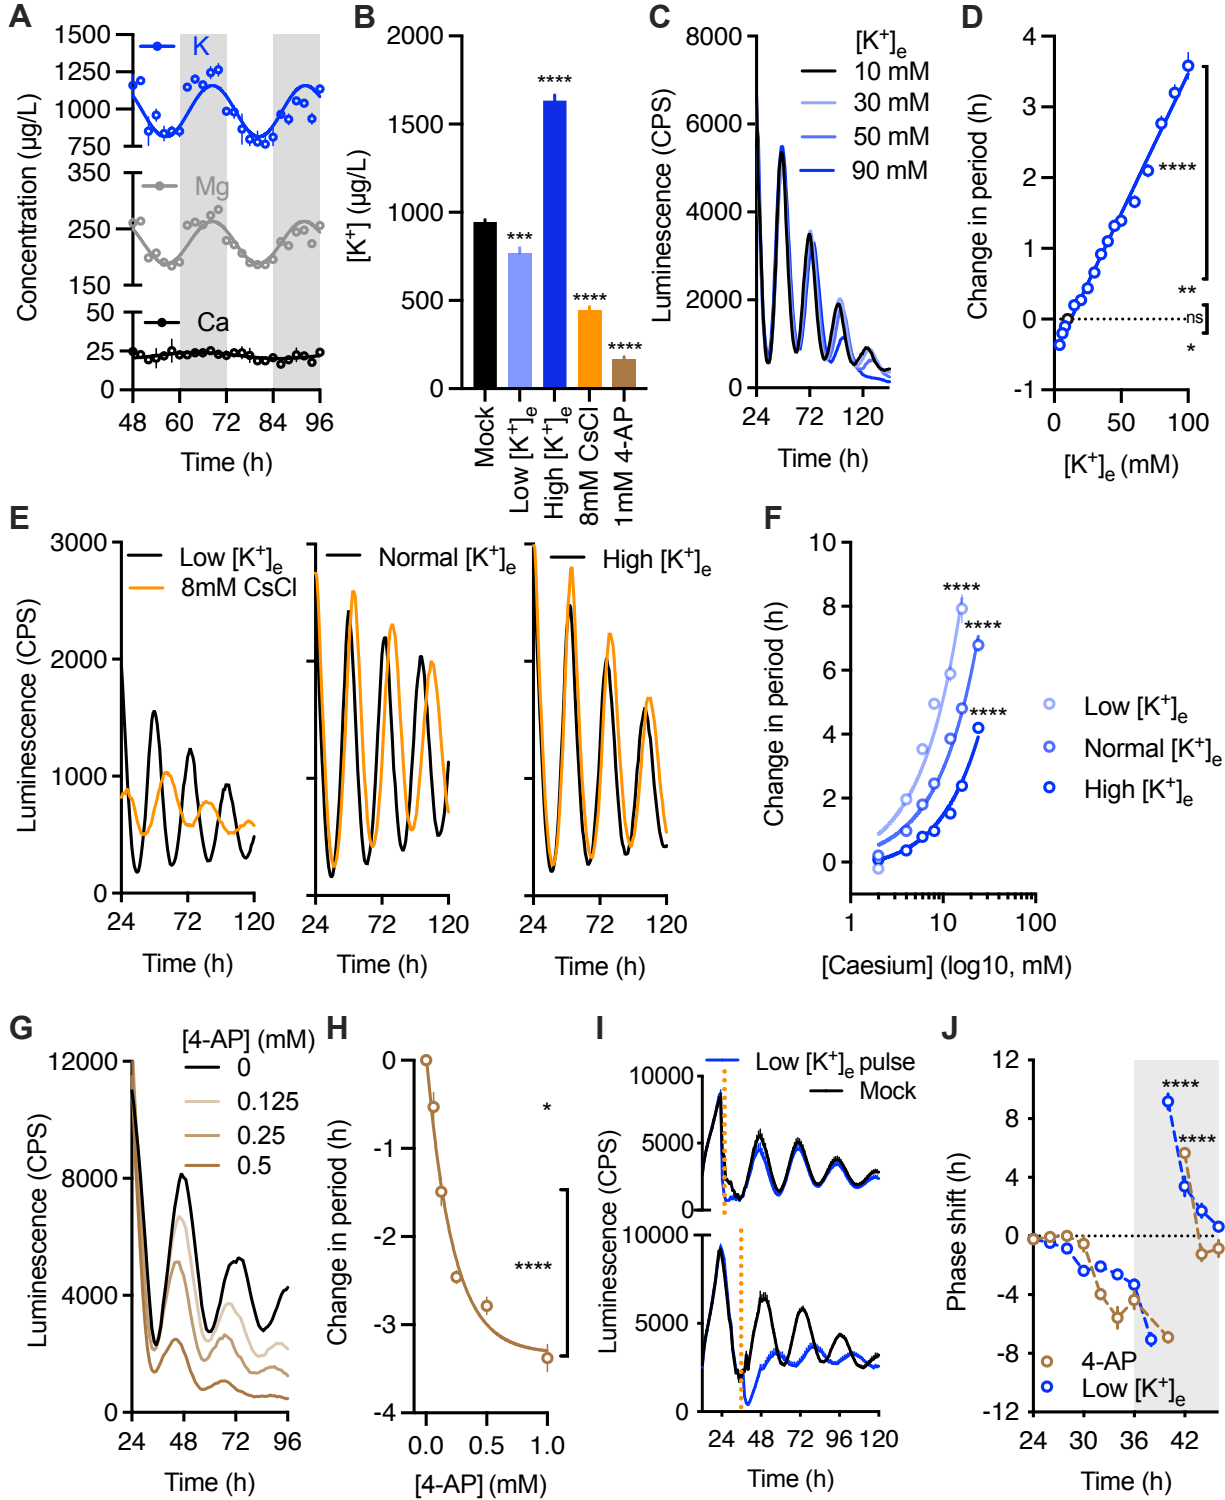

**Figure 1**

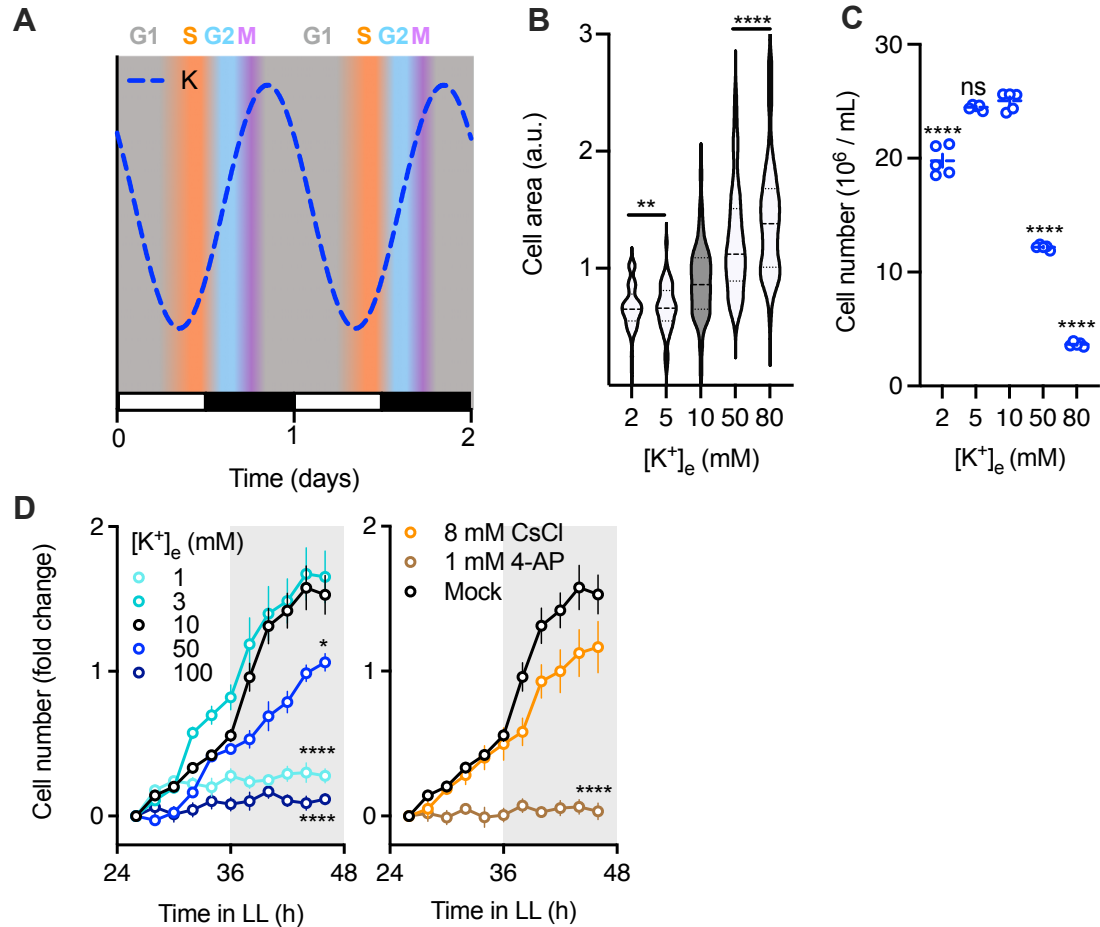

**Figure 2**

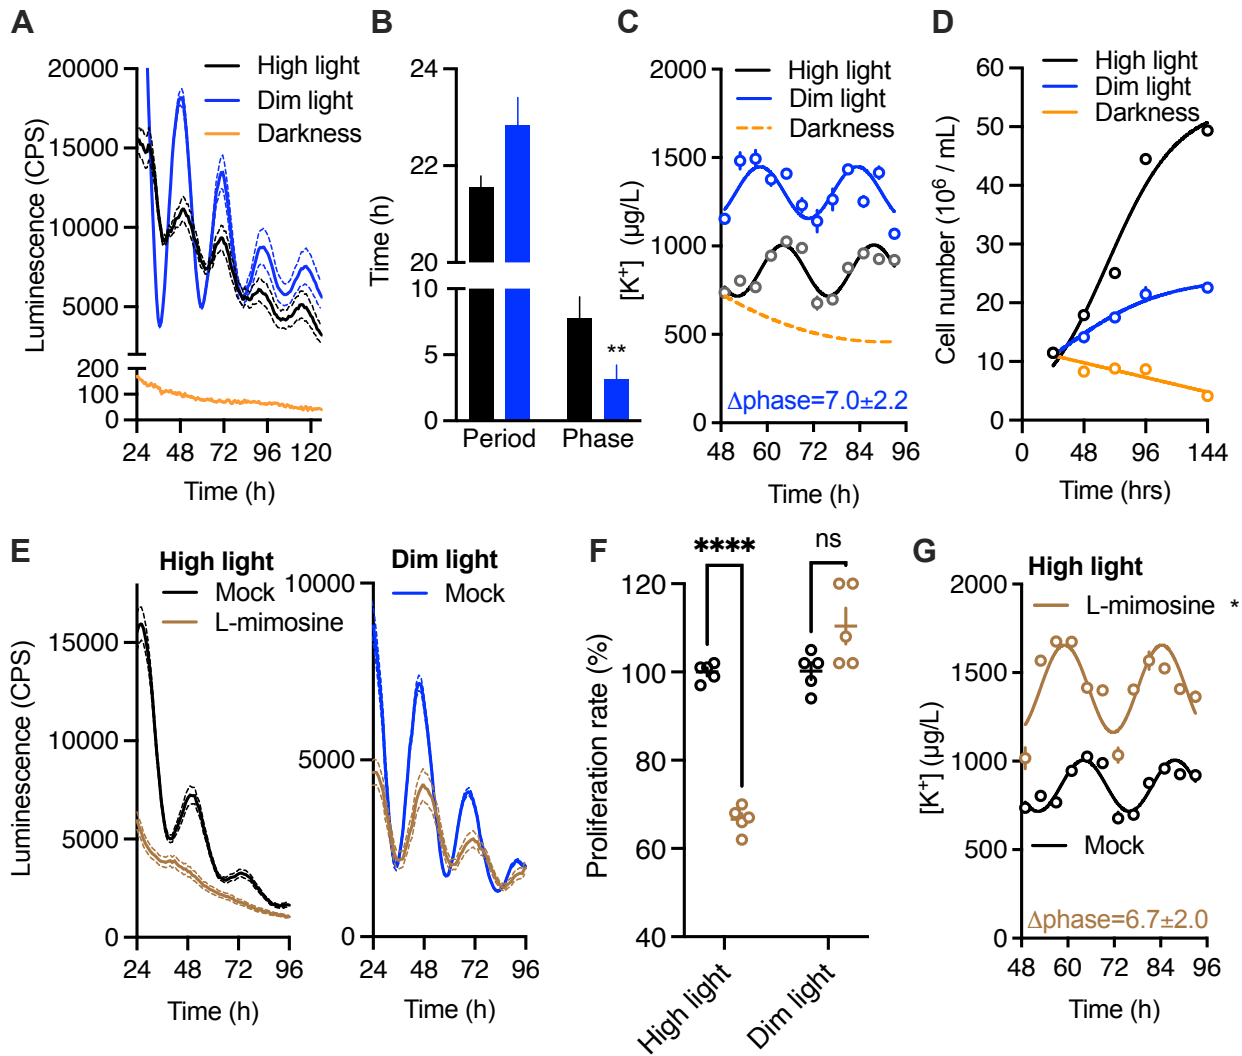

**Figure 3**

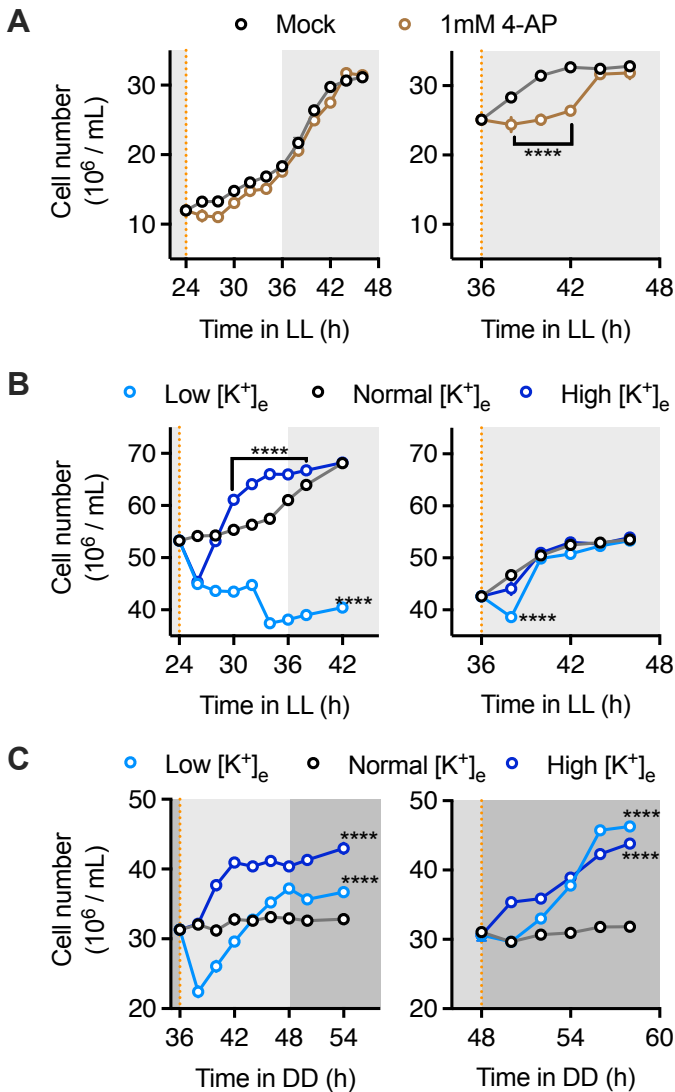

**Figure 4**

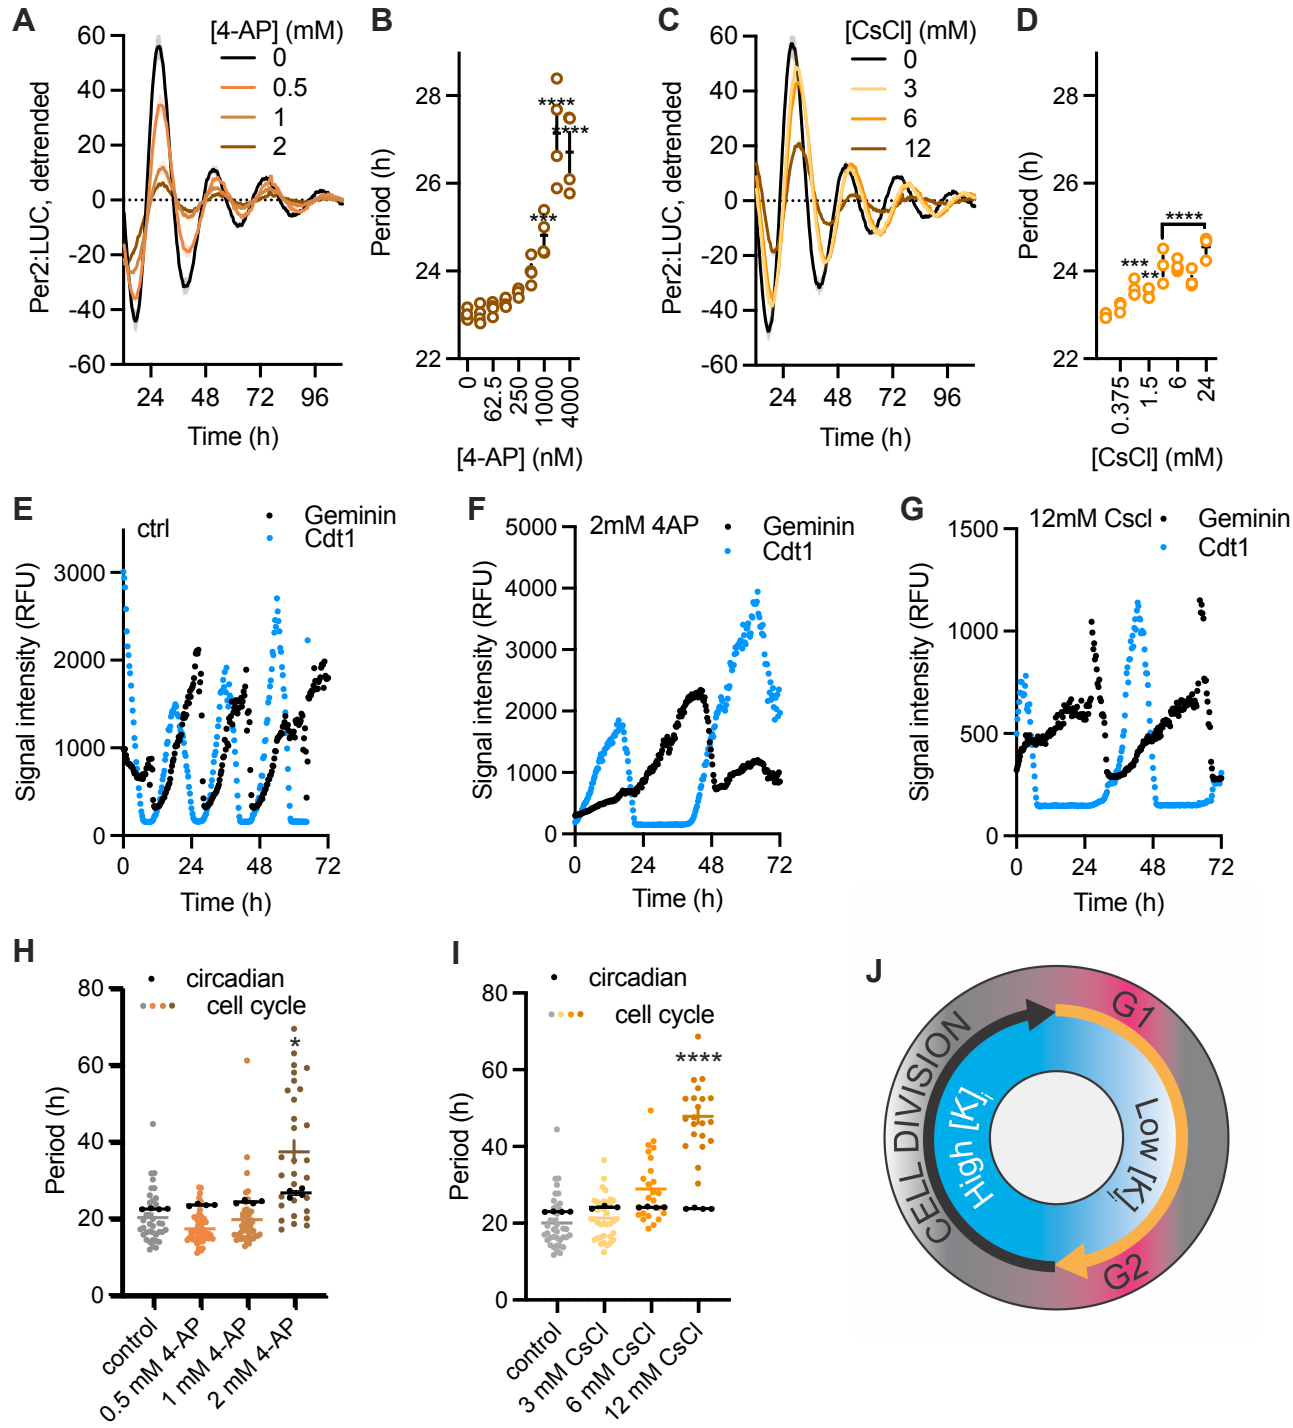

**Figure 5**
